# Supplementary material
Source: PubMed Central journal article supplement (PMC4046784)
Supplement: nn501197v_si_001.pdf [file nn501197v_si_001.pdf]

## Supplementary Information

### **Biodegradable Polymeric Nanoparticles Show High Efficacy and Specificity at DNA Delivery to Human Glioblastoma *In Vitro* and *In Vivo***

*Hugo Guerrero-Cázares*<sup>a,‡</sup>, *Stephany Y. Tzeng*<sup>b,c,‡</sup>, *Noah P. Young*<sup>b,c</sup>, *Ameer O. Abutaleb*<sup>a</sup>,  
*Alfredo Quiñones-Hinojosa*<sup>a,d,\*</sup>, *Jordan J. Green*<sup>a,b,c,d,e,\*</sup>

Department of Neurosurgery<sup>a</sup>, Biomedical Engineering<sup>b</sup>, Translational Tissue Engineering<sup>c</sup>  
Center, Institute for Nanobiotechnology<sup>d</sup>, Ophthalmology<sup>e</sup>, Johns Hopkins University School of  
Medicine, 400 North Broadway, Baltimore, MD 21231

‡ These authors contributed equally.

#### **Corresponding authors:**

Alfredo Quiñones-Hinojosa, 1550 Orleans Street, CRB II, Room 247, Baltimore, MD 21231,  
Tel.: +1 410 502 2869, e-mail: [aquinon2@jhmi.edu](mailto:aquinon2@jhmi.edu)

Jordan J. Green, 400 North Broadway, Smith Building, Room 5017, Baltimore, MD 21231  
Tel.: +1 410 614 9113, e-mail: [green@jhu.edu](mailto:green@jhu.edu)

### JHGBM-276 Oncosphere Transfection

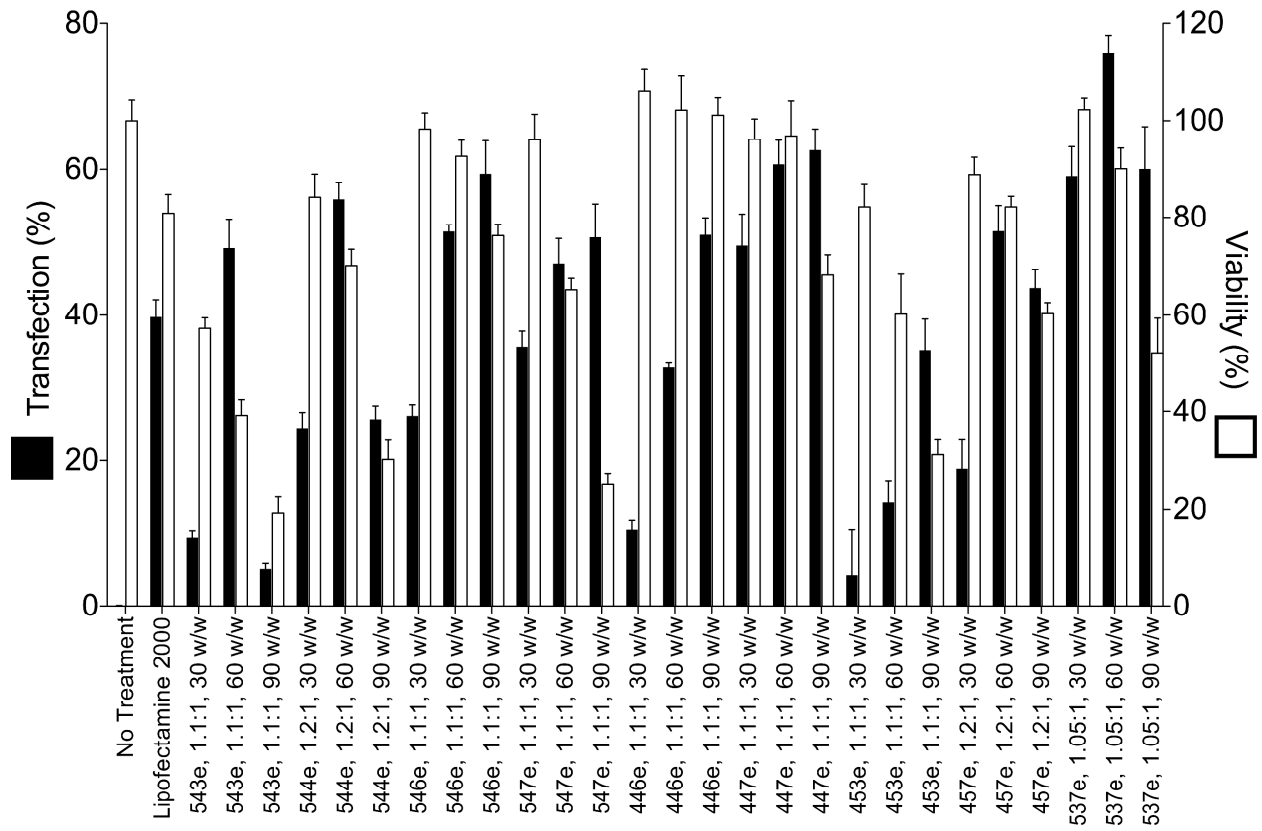

**Supplemental Figure S1. Top PBAEs for transfection of JHGBM551 cells are also effective in other primary human cultures. JHGBM-276 oncospheres were transfected with the same ether-purified polymers as JHGBM-551.**

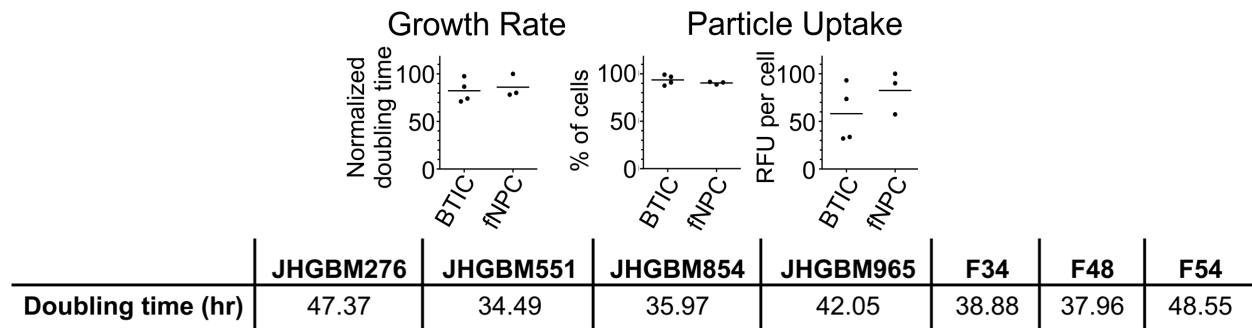

**Supplemental Figure S2. Mechanism of specificity for GBM cells.** The growth rate of the primary cultures are not statistically significantly different between BTICs and fNPCs (two-tailed Student's t-test,  $p > 0.05$ ). Particle uptake measured by the fraction of cells with internalized fluorescent particles (%) or the amount of fluorescent particles internalized (RFU, relative fluorescence units) was also not significantly different between BTICs and fNPCs.
